# Supplementary material
Source: Royal Society of Chemistry journal article supplement (doi:10.1039/d5bm01849h)

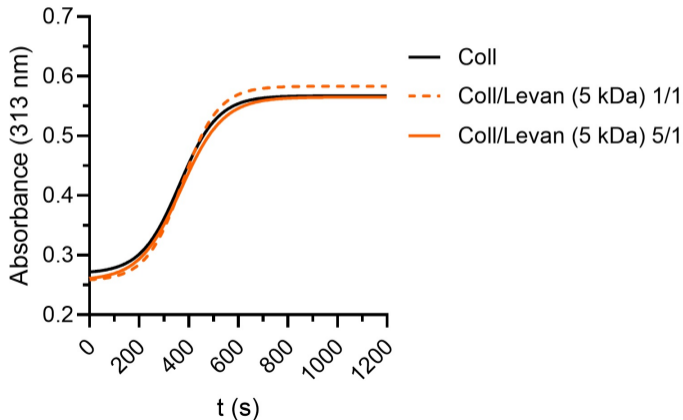

Supplement: d5bm01849h2.pdf [file d5bm01849h2.pdf]

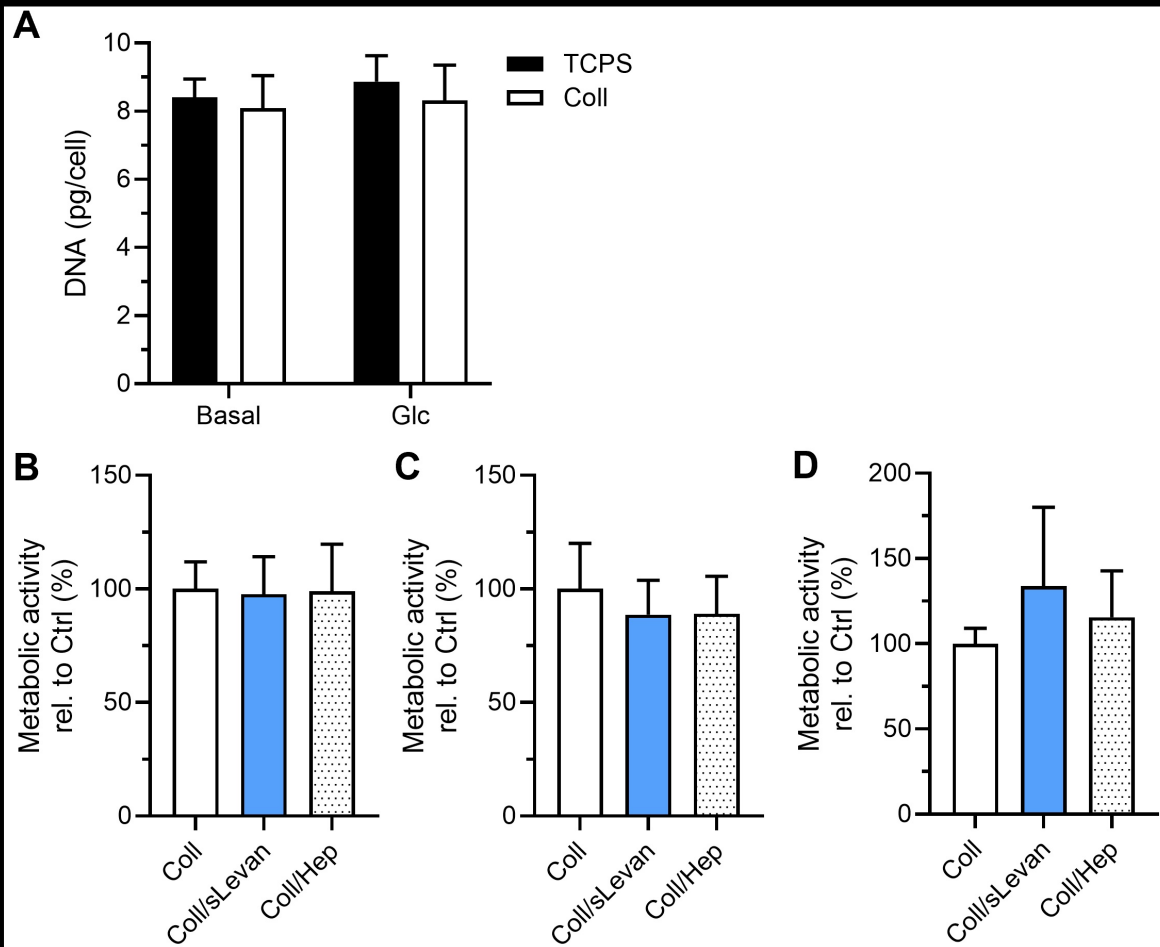

Supplement: d5bm01849h3.pdf [file d5bm01849h3.pdf]

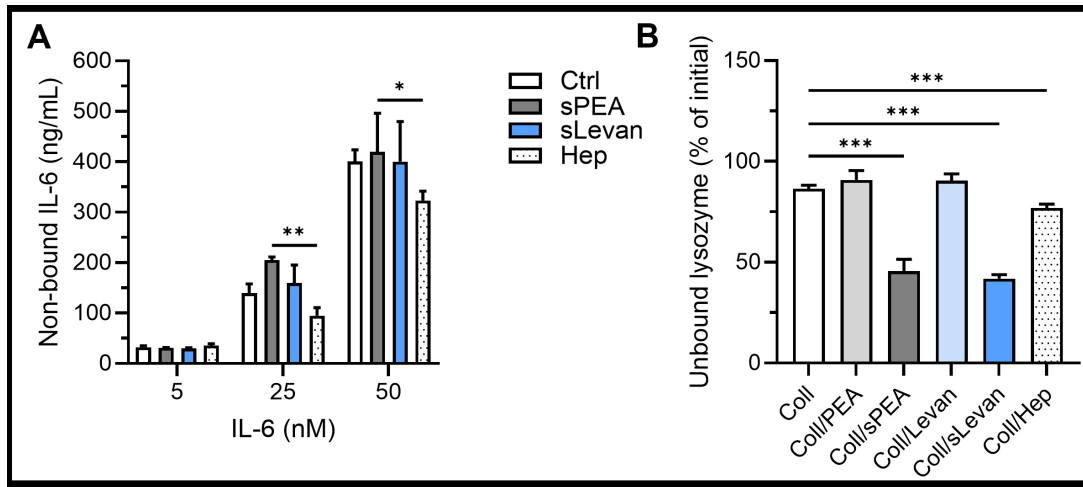

Supplement: d5bm01849h4.pdf [file d5bm01849h4.pdf]

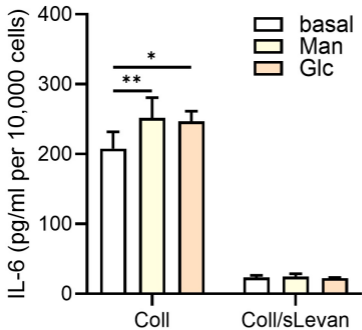

Supplement: d5bm01849h5.pdf [file d5bm01849h5.pdf]
